# Supplementary material for: Characterization, adsorption properties, metal ion-exchange and crystal-to-crystal transformation of Cd3[(Cd4Cl)3(BTT)8(H2O)12]2 framework, where BTT3− = 1,3,5-benzenetristetrazolate
Source: Royal Society of Chemistry journal article supplement (doi:10.1039/c3ce27063g), 2013-01-01
Supplement: c3ce27063g.pdf [file c3ce27063g.pdf]

**Characterization, adsorption properties, metal ion-exchange and  
crystal-to-crystal transformation of  $\text{Cd}_3[(\text{Cd}_4\text{Cl})_3(\text{BTT})_8(\text{H}_2\text{O})_{12}]_2$   
framework, where  $\text{BTT}^{3-} = 1,3,5\text{-benzenetristetrazolate}$**

Ju-Hsiou Liao<sup>\*a</sup>, Wan-Ting Chen<sup>a</sup>, Cherng-Shiaw Tsai<sup>a</sup>, Chih-Chieh Wang<sup>b</sup>

*Department of Chemistry and Biochemistry, National Chung Cheng University  
168 University Road, Min-Hsiung, Chia-Yi, Taiwan, and Department of Chemistry,  
Soochow University, 70 Linhsi Road, Shihlin, Taipei, Taiwan*

**Supporting Information**

**Contents**

- Fig. S1** (a) Simulated powder X-ray diffraction pattern (in red) of **1**, based on single-crystal data. (b) Experimental powder X-ray diffraction pattern of the as-synthesized product (in blue).
- Fig. S2** Experimental X-ray powder diffraction patterns of (a) **1**, (b) **2** and (c) **3**.
- Fig. S3** Thermogravimetric analysis of **1**.
- Fig. S4** (a) Experimental powder X-ray diffraction pattern (in black) of as-synthesized **1**. (b) Experimental powder X-ray diffraction pattern (in red) of **1** annealed at 150°C.
- Fig. S5** (a) Infrared spectrum of as-synthesized **1**. (b) Infrared spectrum of **1** annealed at 150°C. DMF solvent molecules are not completely removed.
- Table S1** The results of ICP-MS for the ion-exchanged products

Fig. S1

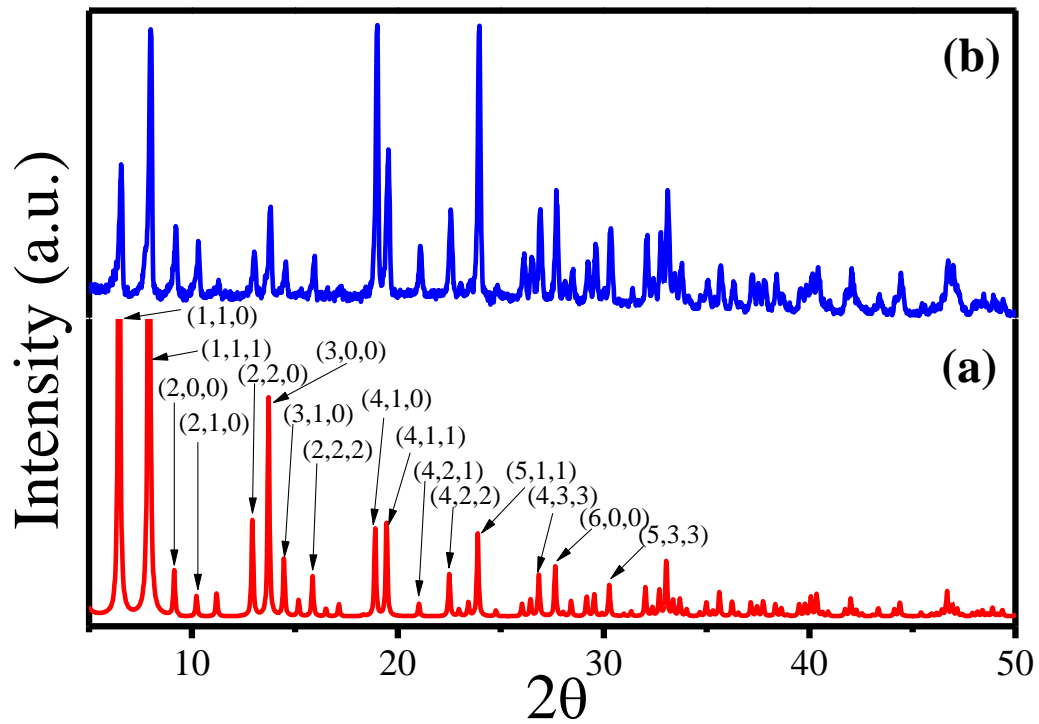

Fig. S2

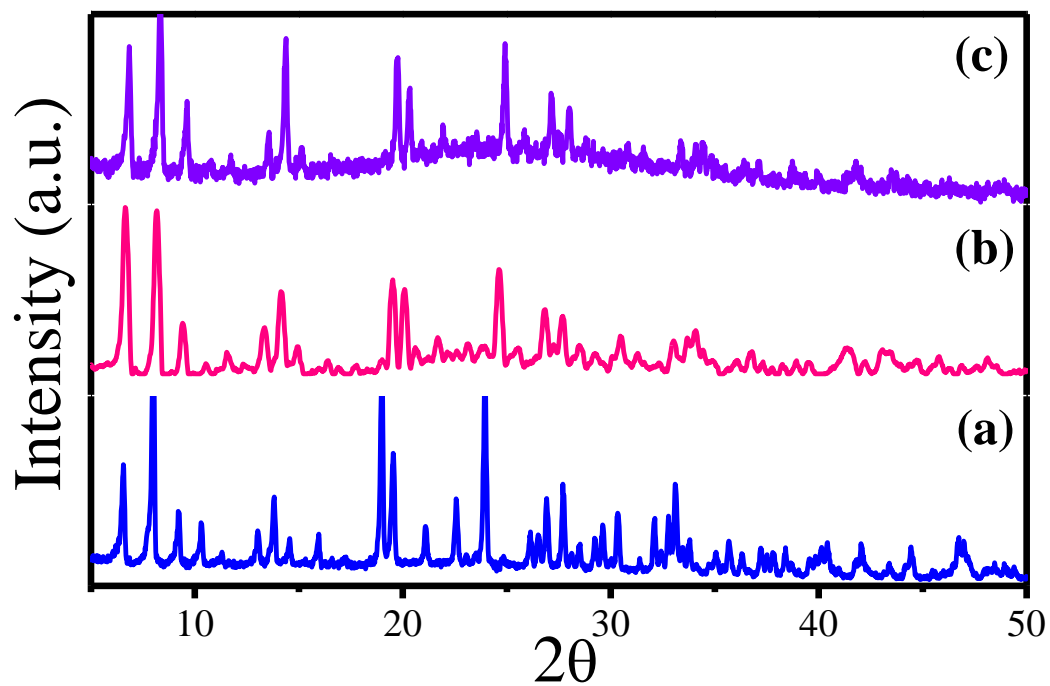

Fig. S3

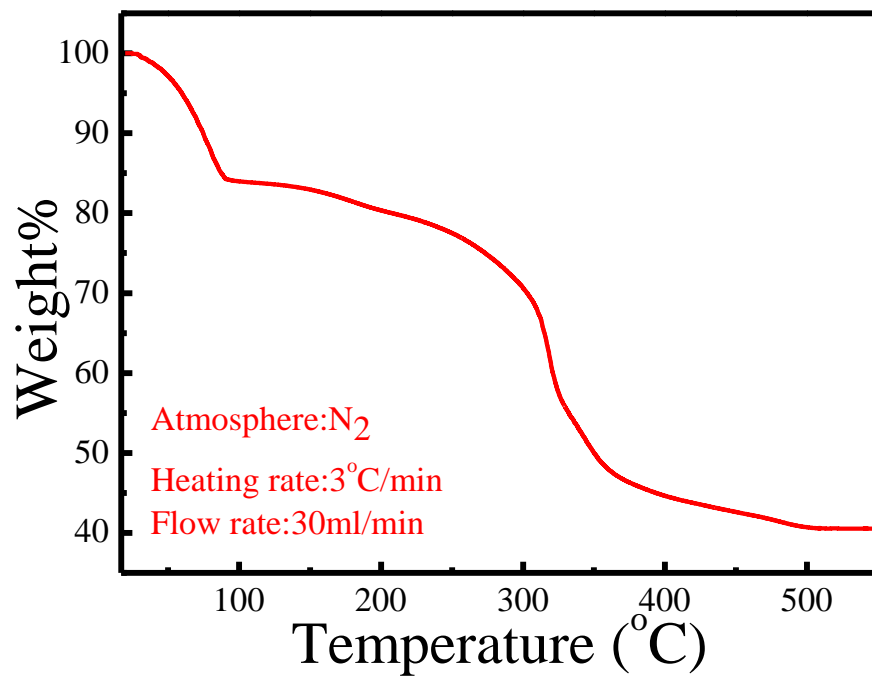

Fig. S4

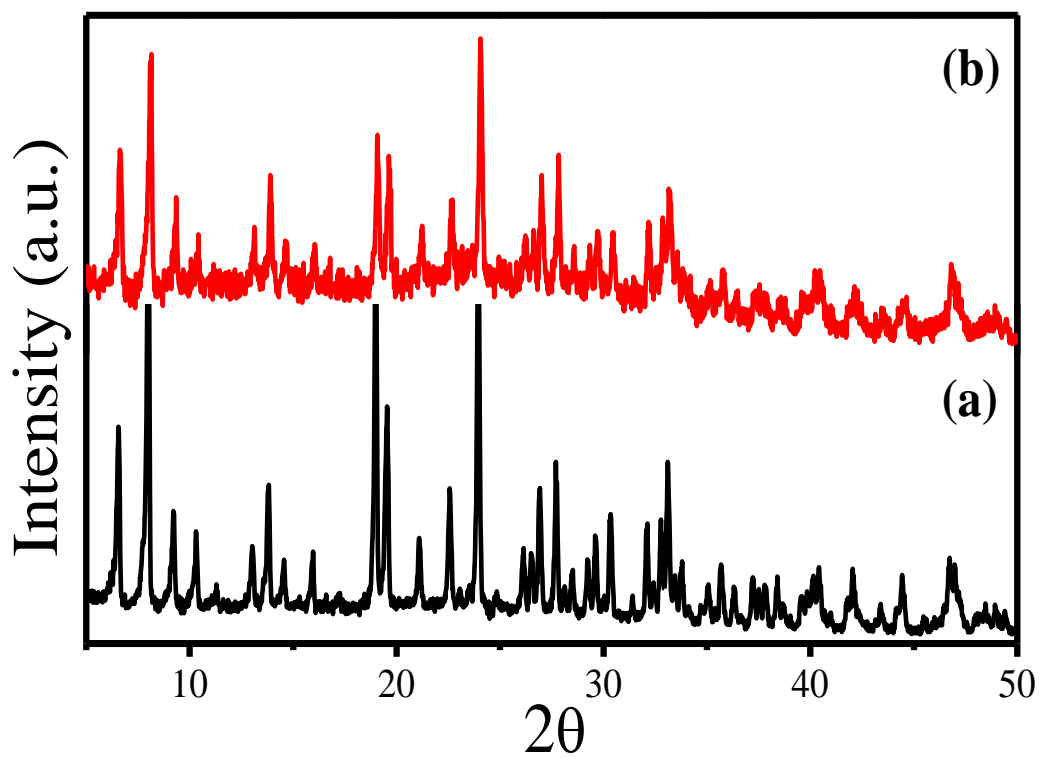

Fig. S5

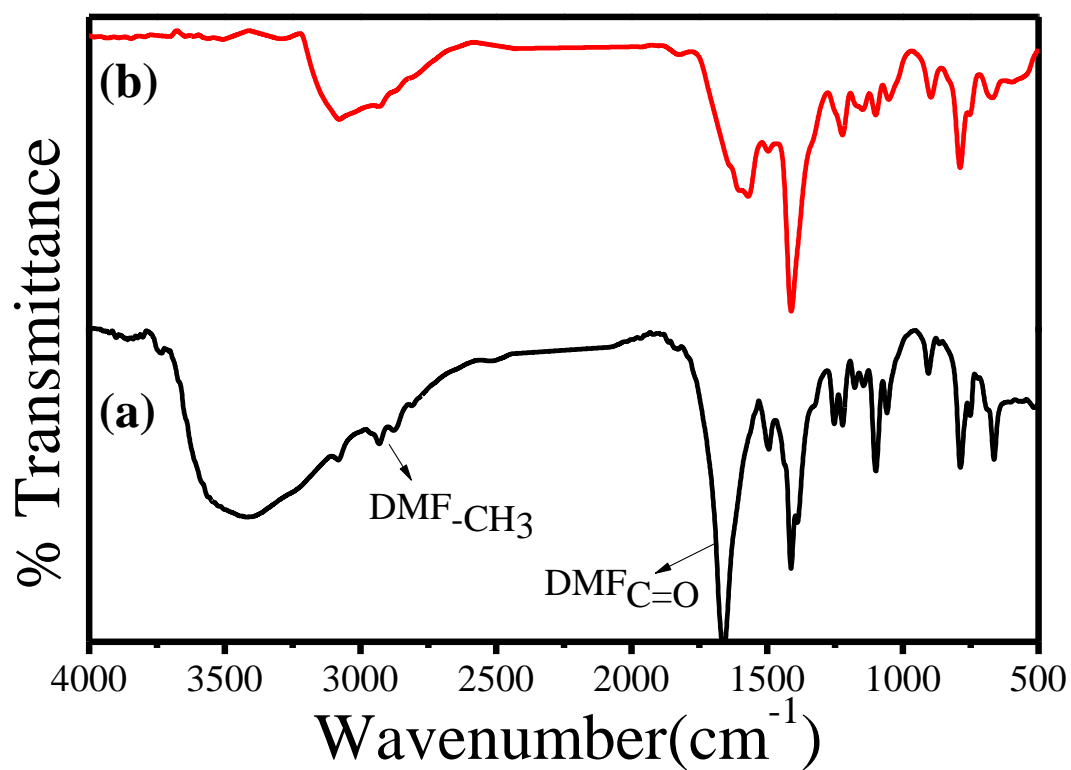

Table S1

The results of ICP-MS for the ion-exchanged products

| Sample\M <sup>2+</sup> | Co <sup>2+</sup> (ppm) | Ni <sup>2+</sup> (ppm) | Cd <sup>2+</sup> (ppm) |
|------------------------|------------------------|------------------------|------------------------|
| 2                      | 364                    | NA                     | 0.86                   |
| 3                      | NA                     | 314                    | 1.75                   |
